# Supplementary material for: Bacterial Feature Finder (BaFF)—a system for extracting features overrepresented in sets of prokaryotic organisms
Source: Oxford University Press journal article supplement (doi:10.1093/bioinformatics/btz099), 2019-02-14
Supplement: bioinformatics_35_18_3482_s1.pdf [file bioinformatics_35_18_3482_s1.pdf]

# Bacterial Feature Finder (BaFF) – A system for extracting features overrepresented in sets of prokaryotic organisms

## *Supplementary Material*

Javier López-Ibáñez, Laura T. Martín, Mónica Chagoyen & Florencio Pazos\*

Computational Systems Biology Group. Systems Biology Program. Spanish National Centre for Biotechnology (CNB-CSIC). c/ Darwin, 3. 28049 Madrid. Spain. Phone: +34-915854669. Fax: +34-915854506.

[pazos@cnb.csic.es](mailto:pazos@cnb.csic.es)

---

### 1.- Statistical Tests

Enrichment analysis statistics were computed using functions from the R *stats* package [1].

For quantitative features (continuous values), a two Sample, two-sided Kolmogorov-Smirnov test (R function: `ks.test()`) was used for checking if both sets of values (input set and background) have the same distribution. We report the p-value of rejecting the hypothesis that both distributions are different.

For qualitative features (discrete values), we compute the probability of obtaining a given annotation randomly from the background set using the cumulative hypergeometric density function (R function: `phyper()`). In these cases a p-value correction for multiple testing is also performed, with Benjamini's False Discovery Rate (FDR) correction [2] (R function: `p.adjust()`).

[1] R Core Team (2015). R: A language and environment for statistical computing. R Foundation for Statistical Computing, Vienna, Austria. URL <https://www.R-project.org/>.

[2] Benjamini, Y. and Hochberg, Y. (1995) Controlling the false discovery rate: A practical and powerful approach to multiple testing. *Journal of the Royal Statistical Society, Series B.* 57: 289-300.

## 2.- Features and sources

| Feature                                                                                                                                                                                                                                                                          | Source Database                    | URL                                                                                                                                                                                                |
|----------------------------------------------------------------------------------------------------------------------------------------------------------------------------------------------------------------------------------------------------------------------------------|------------------------------------|----------------------------------------------------------------------------------------------------------------------------------------------------------------------------------------------------|
| <ul style="list-style-type: none"> <li>• Number of genes</li> </ul>                                                                                                                                                                                                              | EnsemblGenomes                     | <a href="https://img.jgi.doe.gov/cgi-bin/m/main.cgi">https://img.jgi.doe.gov/cgi-bin/m/main.cgi</a><br><a href="http://ensemblgenomes.org/info/genomes">http://ensemblgenomes.org/info/genomes</a> |
| <ul style="list-style-type: none"> <li>• GC content</li> </ul>                                                                                                                                                                                                                   | NCBI Genome                        | <a href="https://www.ncbi.nlm.nih.gov/genome/">https://www.ncbi.nlm.nih.gov/genome/</a>                                                                                                            |
| <ul style="list-style-type: none"> <li>• Biosystems</li> </ul>                                                                                                                                                                                                                   | NCBI biosystems                    | <a href="https://www.ncbi.nlm.nih.gov/biosystems">https://www.ncbi.nlm.nih.gov/biosystems</a>                                                                                                      |
| <ul style="list-style-type: none"> <li>• COG Functional Classes (25)</li> </ul>                                                                                                                                                                                                  | Microbesonline                     | <a href="http://www.microbesonline.org/cgi-bin/genomeInfo.cgi">http://www.microbesonline.org/cgi-bin/genomeInfo.cgi</a>                                                                            |
| <ul style="list-style-type: none"> <li>• Gram staining</li> <li>• Sporulation</li> <li>• Motility</li> <li>• Shape</li> <li>• Biotic Relationships</li> <li>• Phenotype</li> <li>• Oxygen requirement</li> <li>• Temperature range</li> <li>• Disease</li> <li>• Host</li> </ul> | Integrated Microbial genomes (IMG) | <a href="https://img.jgi.doe.gov/">https://img.jgi.doe.gov/</a>                                                                                                                                    |
| <ul style="list-style-type: none"> <li>• Taxonomy</li> </ul>                                                                                                                                                                                                                     | NCBI Taxonomy                      | <a href="https://www.ncbi.nlm.nih.gov/Taxonomy/">https://www.ncbi.nlm.nih.gov/Taxonomy/</a>                                                                                                        |

### 3.- Screenshots of the interface

## BaFF

Bacterial Features Finder

**BaFF** [Help/Tutorial](#)

---

### Bacterial Features

Get a list of bacteria sharing one or more of the following criteria. You can use it as input for an overrepresentation analysis.

Taxonomy ID

Name

Disease

Taxonomy

Gram staining

Biosystems

Phenotype

Sporulation

Motility

Temperature range

Oxygen requirement

Biotic relationships

Cell Shape

Number of genes:  -

%GC content:  -

Search Bacteria

Clear Fields

---

### Overrepresentation Analysis

Load your own file or use the results from a previous search to perform an enrichment analysis of bacterial features. In case you don't provide a background set, the whole database will be used as background.

**Input Set**

Browse...

Use search results

**Background Set**

Browse...

Use search results

Get enriched features

Computational Systems Biology Group · CNB - CSIC

Support: jlopezibanez{at}cnb.csic.es

### Main interface

### Feature Search Results

692 bacteria matching your criteria found.

| #  | Tax ID | Name                                                                | Lineage                                                                                                                    |
|----|--------|---------------------------------------------------------------------|----------------------------------------------------------------------------------------------------------------------------|
| 1  | 2342   | Candidatus Sodalis pierantonius str. SOPE                           | Bacteria>Proteobacteria>Gammaproteobacteria>Enterobacteriales>Pectobacteriaceae>Sodalis>Candidatus Sodalis pierantonius    |
| 2  | 36870  | Wigglesworthia glossinidia endosymbiont of Glossina brevipalpis     | Bacteria>Proteobacteria>Gammaproteobacteria>Enterobacteriales>Erwiniaceae>Wigglesworthia>Wigglesworthia glossinidia        |
| 3  | 66270  | Pantoea stewartii subsp. indologenes                                | Bacteria>Proteobacteria>Gammaproteobacteria>Enterobacteriales>Erwiniaceae>Pantoea>Pantoea stewartii                        |
| 4  | 98360  | Salmonella enterica subsp. enterica serovar Dublin                  | Bacteria>Proteobacteria>Gammaproteobacteria>Enterobacteriales>Enterobacteriaceae>Salmonella>Salmonella enterica            |
| 5  | 99287  | Salmonella enterica subsp. enterica serovar Typhimurium str. LT2    | Bacteria>Proteobacteria>Gammaproteobacteria>Enterobacteriales>Enterobacteriaceae>Salmonella>Salmonella enterica            |
| 6  | 107806 | Buchnera aphidicola str. APS (Acyrthosiphon pisum)                  | Bacteria>Proteobacteria>Gammaproteobacteria>Enterobacteriales>Erwiniaceae>Buchnera>Buchnera aphidicola                     |
| 7  | 187410 | Yersinia pestis KIM10+                                              | Bacteria>Proteobacteria>Gammaproteobacteria>Enterobacteriales>Yersiniaceae>Yersinia>Yersinia pestis                        |
| 8  | 198214 | Shigella flexneri 2a str. 301                                       | Bacteria>Proteobacteria>Gammaproteobacteria>Enterobacteriales>Enterobacteriaceae>Shigella>Shigella flexneri                |
| 9  | 198804 | Buchnera aphidicola str. Sg (Schizaphis graminum)                   | Bacteria>Proteobacteria>Gammaproteobacteria>Enterobacteriales>Erwiniaceae>Buchnera>Buchnera aphidicola                     |
| 10 | 199310 | Escherichia coli CFT073                                             | Bacteria>Proteobacteria>Gammaproteobacteria>Enterobacteriales>Enterobacteriaceae>Escherichia>Escherichia coli              |
| 11 | 203907 | Candidatus Blochmannia floridanus                                   | Bacteria>Proteobacteria>Gammaproteobacteria>Enterobacteriales>Enterobacteriaceae>Candidatus Blochmannia                    |
| 12 | 209261 | Salmonella enterica subsp. enterica serovar Typhi str. Ty2          | Bacteria>Proteobacteria>Gammaproteobacteria>Enterobacteriales>Enterobacteriaceae>Salmonella>Salmonella enterica            |
| 13 | 215889 | Erwinia sp. Ejp617                                                  | Bacteria>Proteobacteria>Gammaproteobacteria>Enterobacteriales>Erwiniaceae>Erwinia                                          |
| 14 | 216597 | Salmonella enterica subsp. enterica serovar Typhimurium str. SL1344 | Bacteria>Proteobacteria>Gammaproteobacteria>Enterobacteriales>Enterobacteriaceae>Salmonella>Salmonella enterica            |
| 15 | 216599 | Shigella sonnei 53G                                                 | Bacteria>Proteobacteria>Gammaproteobacteria>Enterobacteriales>Enterobacteriaceae>Shigella>Shigella sonnei                  |
| 16 | 218491 | Pectobacterium atrosepticum SCR11043                                | Bacteria>Proteobacteria>Gammaproteobacteria>Enterobacteriales>Pectobacteriaceae>Pectobacterium>Pectobacterium atrosepticum |
| 17 | 218493 | Salmonella bongori NCTC 12419                                       | Bacteria>Proteobacteria>Gammaproteobacteria>Enterobacteriales>Enterobacteriaceae>Salmonella>Salmonella bongori             |
| 18 | 220341 | Salmonella enterica subsp. enterica serovar Typhi str. CT18         | Bacteria>Proteobacteria>Gammaproteobacteria>Enterobacteriales>Enterobacteriaceae>Salmonella>Salmonella enterica            |
| 19 | 224915 | Buchnera aphidicola str. Bp (Baizongia pistaciae)                   | Bacteria>Proteobacteria>Gammaproteobacteria>Enterobacteriales>Erwiniaceae>Buchnera>Buchnera aphidicola                     |
| 20 | 229193 | Yersinia pestis biovar Microtus str. 91001                          | Bacteria>Proteobacteria>Gammaproteobacteria>Enterobacteriales>Yersiniaceae>Yersinia>Yersinia pestis                        |

Pages: [1](#) [2](#) [3](#) [4](#) [5](#) [6](#) [7](#) [8](#) [9](#) [10](#) [11](#) [12](#) [13](#) [14](#) [15](#) [16](#) [17](#) [18](#) [19](#) [20](#) [21](#) [22](#) [23](#) [24](#) [25](#) [26](#) [27](#) [28](#) [29](#) [30](#) [31](#) [32](#) [33](#) [34](#) [35](#) >

### Paginated results of a database search

## Overrepresentation Analysis Results

Showing enrichment results for the findings of a previous search. Using the default background set.  
Found annotations for 692 out of 692 IDs..

You can show/hide different categories of features in the results table with the boxes below:

- Biosystems   
  Biotic Relationships   
  Motility   
  Taxonomy   
  Shape   
  Temperature range  
 Sporulation   
 Oxygen requirement   
 Disease   
 Phenotype   
 Host   
 COG code

Save Results

| Feature                                                          | Category    | p-value  | FDR      |
|------------------------------------------------------------------|-------------|----------|----------|
| %GC content                                                      | %GC content | 0.00e+0  | -        |
| 2-Aminoethylphosphonate transport system                         | Biosystems  | 1.33e-8  | 2.33e-8  |
| 2-Oxocarboxylic acid metabolism                                  | Biosystems  | 8.13e-4  | 1.19e-3  |
| A: RNA processing and modification                               | COG code    | 0.00e+0  | -        |
| Acyrthosiphon pisum                                              | Host        | 1.30e-7  | 3.65e-6  |
| Adenine ribonucleotide biosynthesis, IMP => ADP,ATP              | Biosystems  | 1.38e-6  | 2.26e-6  |
| Adhesin protein transport system                                 | Biosystems  | 7.64e-12 | 1.45e-11 |
| ADP-L-glycero-D-manno-heptose biosynthesis                       | Biosystems  | 0.00e+0  | 0.00e+0  |
| AI-2 transport system                                            | Biosystems  | 0.00e+0  | 0.00e+0  |
| Alanine, aspartate and glutamate metabolism                      | Biosystems  | 3.11e-3  | 4.40e-3  |
| alpha-Hemolysin/cyclolysin transport system                      | Biosystems  | 2.07e-4  | 3.12e-4  |
| alpha-Linolenic acid metabolism                                  | Biosystems  | 0.00e+0  | 0.00e+0  |
| Aminobenzoate degradation                                        | Biosystems  | 4.74e-12 | 9.04e-12 |
| Aminoglycoside resistance, protease FtsH                         | Biosystems  | 0.00e+0  | 0.00e+0  |
| Aminoglycoside resistance, protease HtpX                         | Biosystems  | 0.00e+0  | 0.00e+0  |
| Arachidonic acid metabolism                                      | Biosystems  | 0.00e+0  | 0.00e+0  |
| ArcB-ArcA (anoxic redox control) two-component regulatory system | Biosystems  | 0.00e+0  | 0.00e+0  |
| Arginine and proline metabolism                                  | Biosystems  | 6.25e-2  | 8.00e-2  |
| Arginine biosynthesis                                            | Biosystems  | 3.56e-5  | 5.46e-5  |
| Arginine transport system                                        | Biosystems  | 0.00e+0  | 0.00e+0  |
| Ascorbate and aldarate metabolism                                | Biosystems  | 4.43e-13 | 8.65e-13 |
| Ascorbate degradation, ascorbate => D-xylose-5P                  | Biosystems  | 0.00e+0  | 0.00e+0  |

Results of the analysis of enriched features.
